# Supplementary material for: A fluorine-18 labeled radiotracer for PET imaging of γ-glutamyltranspeptidase in living subjects
Source: Royal Society of Chemistry journal article supplement (doi:10.1039/d1ra01324f), 2021-01-01
Supplement: d1ra01324f1.pdf [file d1ra01324f1.pdf]

*Electronic supplementary information*

**A Fluorine-18 Labeled Radiotracer for PET Imaging of  $\gamma$ -  
Glutamyltranspeptidase in Living Subjects**

Dingyao Gao<sup>a,b</sup>, Yinxing Miao<sup>b</sup>, Siqin Ye<sup>b</sup>, Chunmei Lu<sup>a,b</sup>, Gaochao Lv<sup>b</sup>, Ke Li<sup>b</sup>, Chunjing Yu<sup>c,\*</sup>, Jianguo Lin<sup>b,\*</sup>, and Ling Qiu<sup>a,b,\*</sup>

*<sup>a</sup>School of Chemical and Material Engineering, Jiangnan University, Wuxi 214122, China*

*<sup>b</sup>NHC Key Laboratory of Nuclear Medicine, Jiangsu Key Laboratory of Molecular Nuclear Medicine, Jiangsu Institute of Nuclear Medicine, Wuxi 214063, China*

*<sup>c</sup>Department of Nuclear Medicine, Affiliated Hospital of Jiangnan University, Wuxi 214062, China.*

Corresponding Authors, \*Email: [qiuling@jsinm.org](mailto:qiuling@jsinm.org) (L. Qiu), [linjianguo@jsinm.org](mailto:linjianguo@jsinm.org) (J. Lin)  
or [ycj\\_wxd1978@163.com](mailto:ycj_wxd1978@163.com) (C. Yu)

**Table S1.** HPLC conditions for purification of compound **5**.

| Time/min | Flow (mL/min) | A phase (%) | B phase (%) |
|----------|---------------|-------------|-------------|
| 0        | 3             | 80          | 20          |
| 3        | 3             | 80          | 20          |
| 6        | 3             | 47          | 53          |
| 30       | 3             | 35          | 65          |
| 35       | 3             | 10          | 90          |
| 40       | 3             | 80          | 20          |

A phase: 0.1% TFA of water; B phase: 0.1% TFA of MeCN.

**Table S2.** HPLC conditions for purification of non-radioactive probe (**GCPA**)<sub>2</sub>.

| Time/min | Flow (mL/min) | A phase (%) | B phase (%) |
|----------|---------------|-------------|-------------|
| 0        | 3             | 80          | 20          |
| 3        | 3             | 80          | 20          |
| 6        | 3             | 50          | 50          |
| 30       | 3             | 38          | 62          |
| 35       | 3             | 10          | 90          |
| 40       | 3             | 80          | 20          |

A phase: 0.1% TFA of water; B phase: 0.1% TFA of MeCN.

**Table S3.** Analytical HPLC conditions of all compounds.

| Time/min | Flow (mL/min) | A phase (%) | B phase (%) |
|----------|---------------|-------------|-------------|
| 0        | 1             | 80          | 20          |
| 3        | 1             | 80          | 20          |
| 35       | 1             | 10          | 90          |
| 40       | 1             | 80          | 20          |

A phase: 0.1% TFA of water; B phase: 0.1% TFA of MeCN.

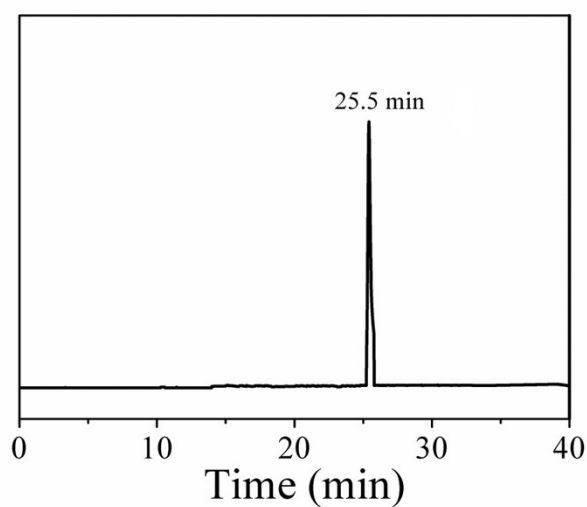

**Fig. S1.** HPLC trace of compound **2**.

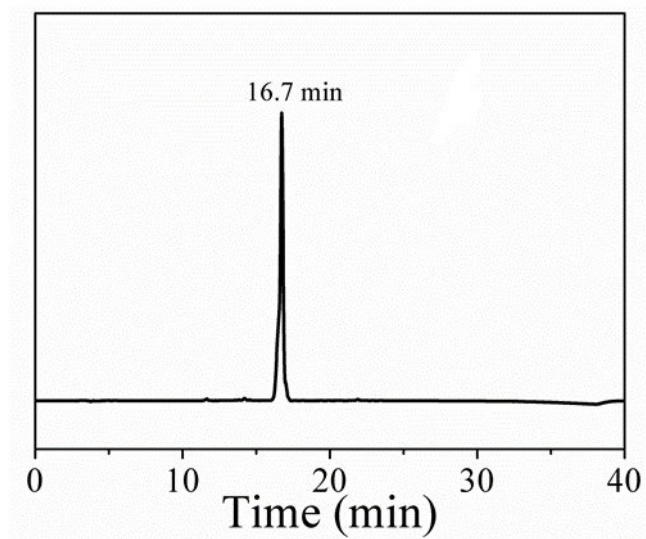

**Fig. S2.** HPLC trace of compound 3.

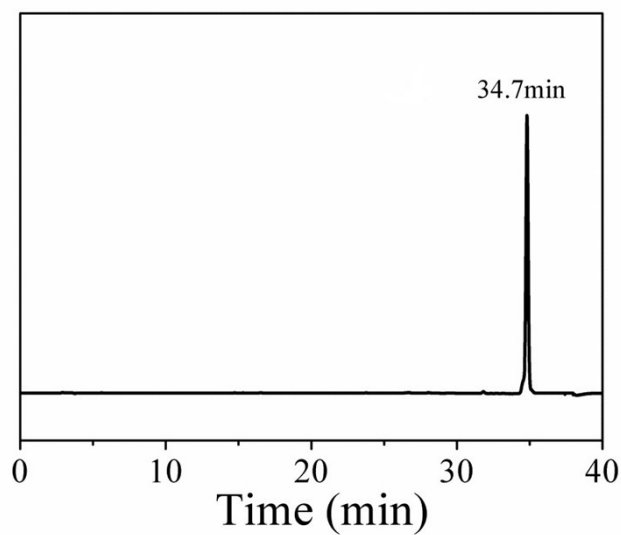

**Fig. S3.** HPLC trace of compound 4.

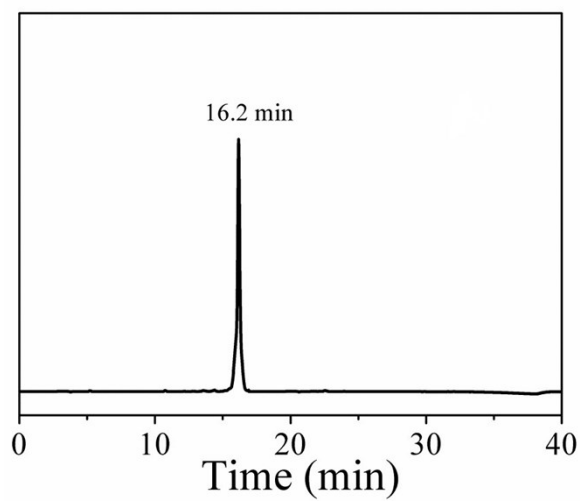

**Fig. S4.** HPLC trace of compound 5.

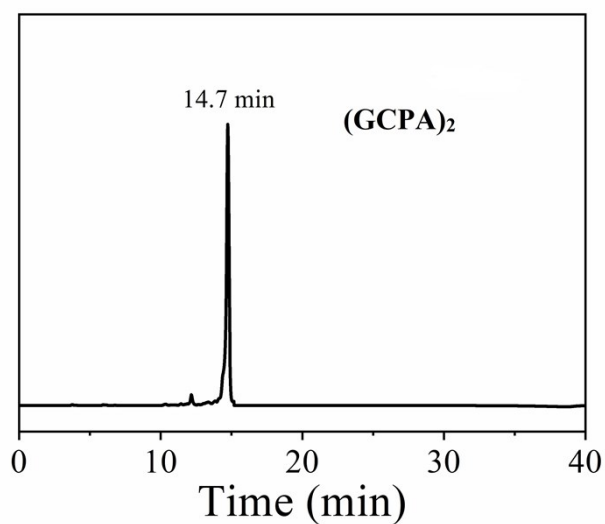

**Fig. S5.** HPLC trace of non-radioactive probe (GCPA)<sub>2</sub>.

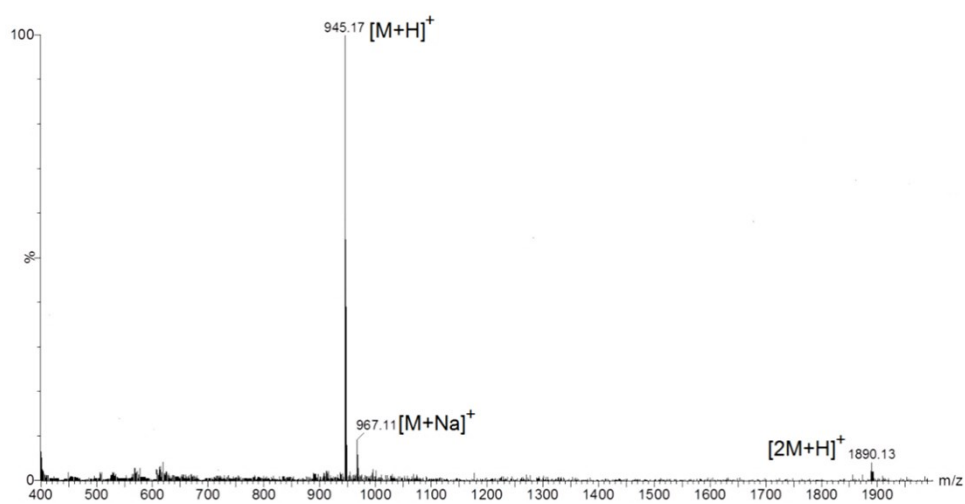

**Fig. S6.** ESI-MS analysis of compound 2.

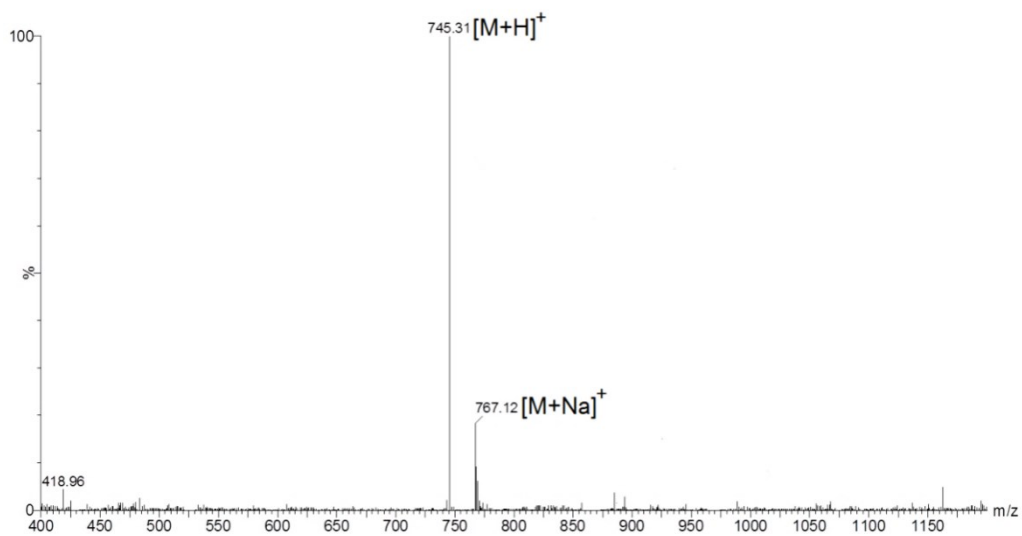

**Fig. S7.** ESI-MS analysis of compound 3.

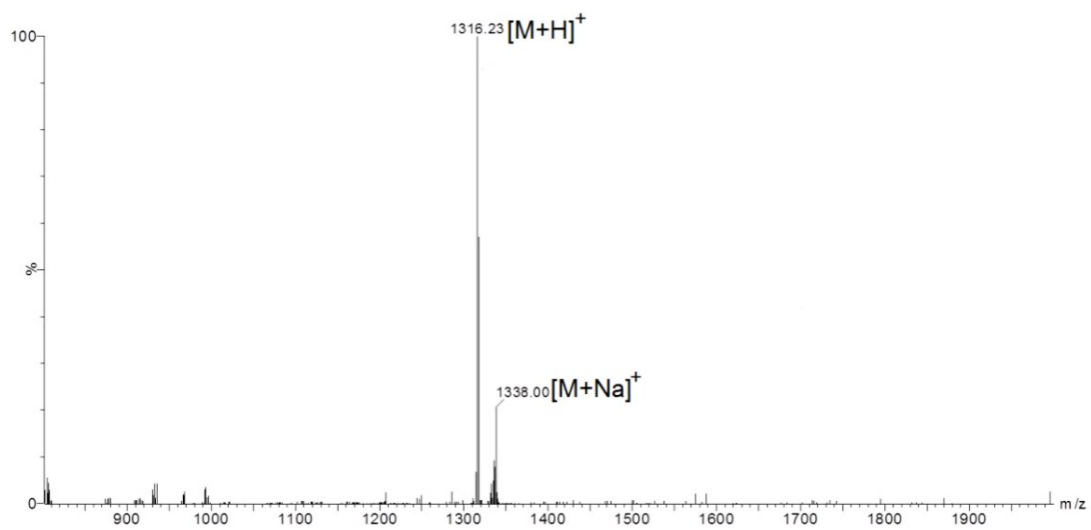

**Fig. S8.** ESI-MS analysis of compound 4.

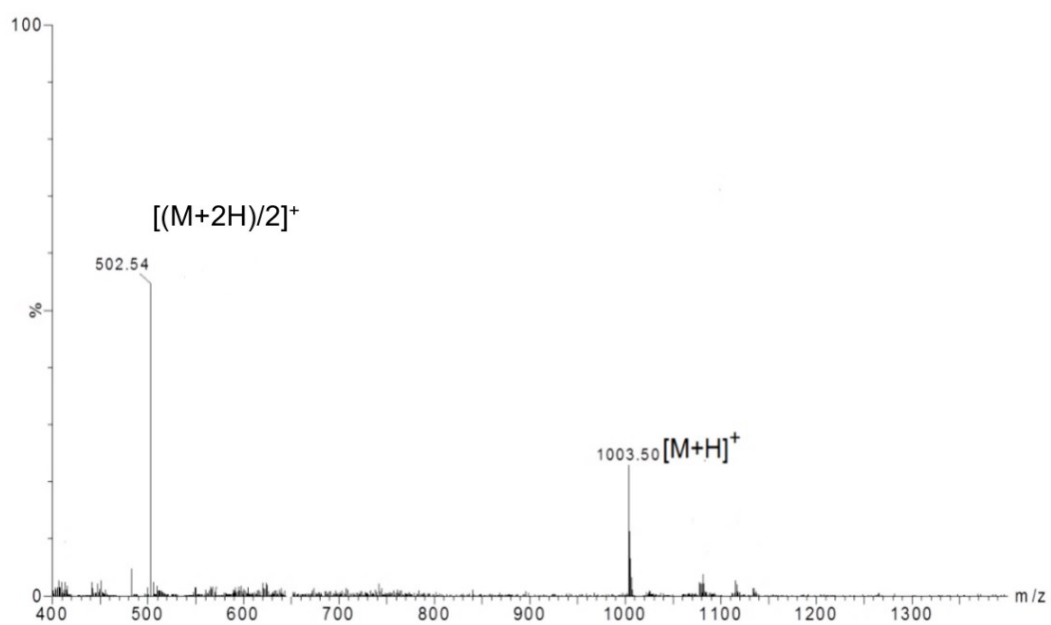

**Fig. S9.** ESI-MS analysis of compound 5.

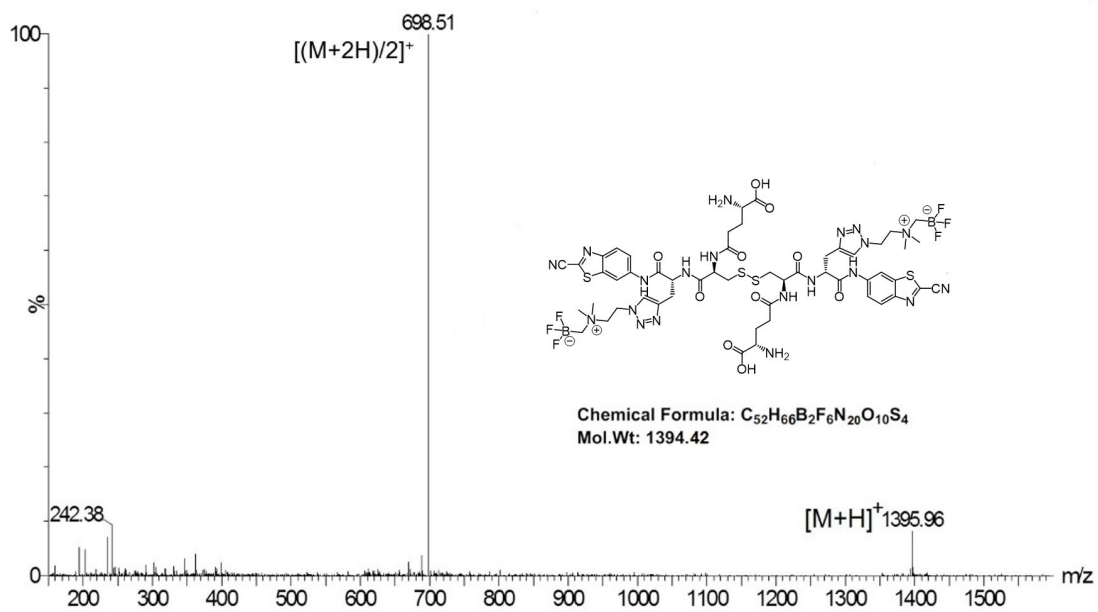

Fig. S10. ESI-MS analysis of non-radioactive probe (GCPA)<sub>2</sub>.

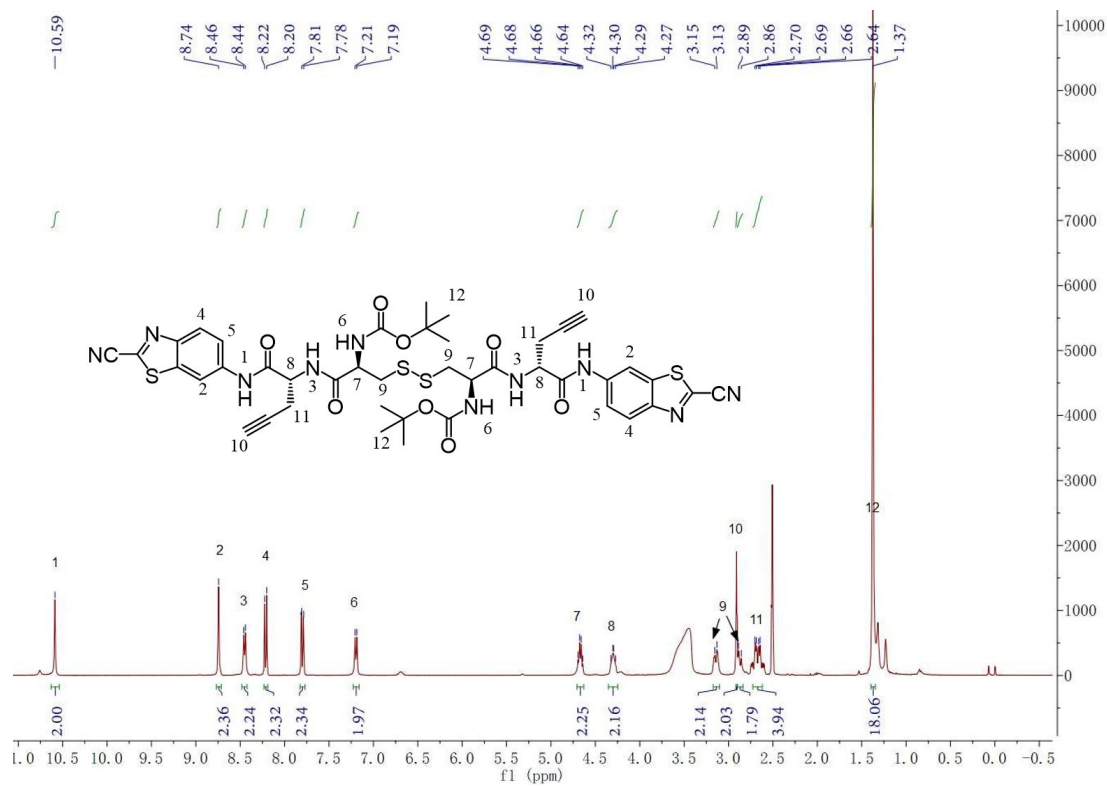

Fig. S11. <sup>1</sup>H NMR spectrum of compound 2.

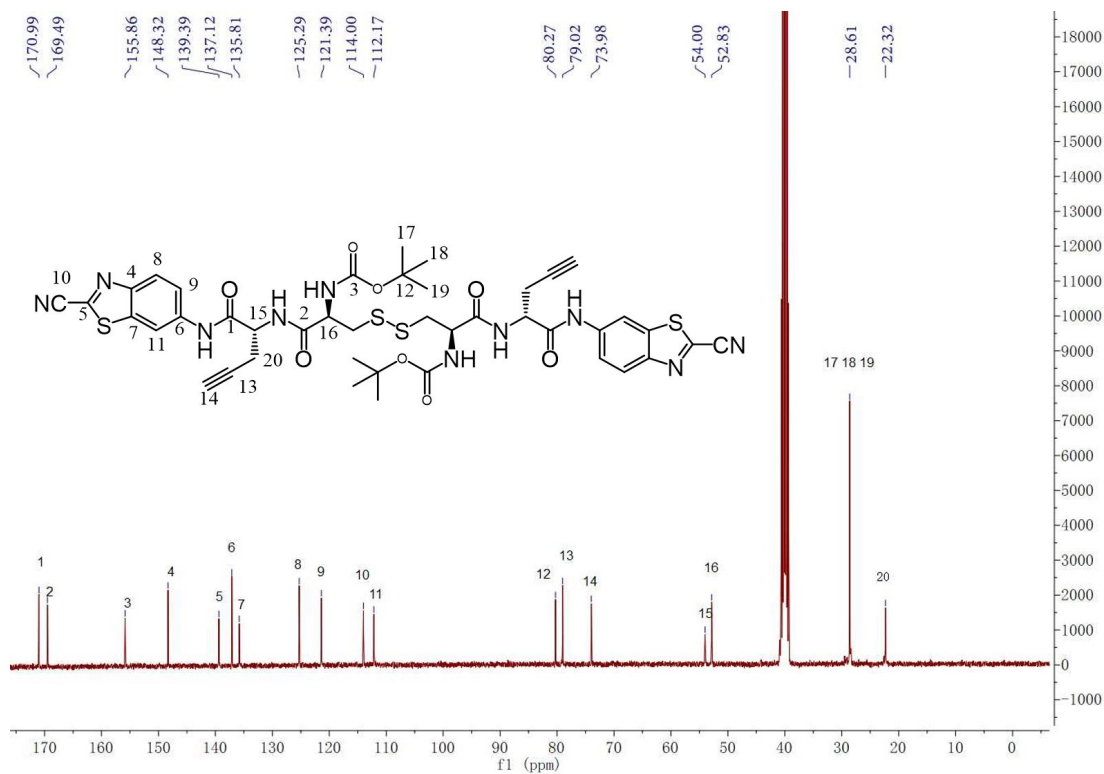

**Fig. S12.**  $^{13}\text{C}$  NMR spectrum of compound 2.

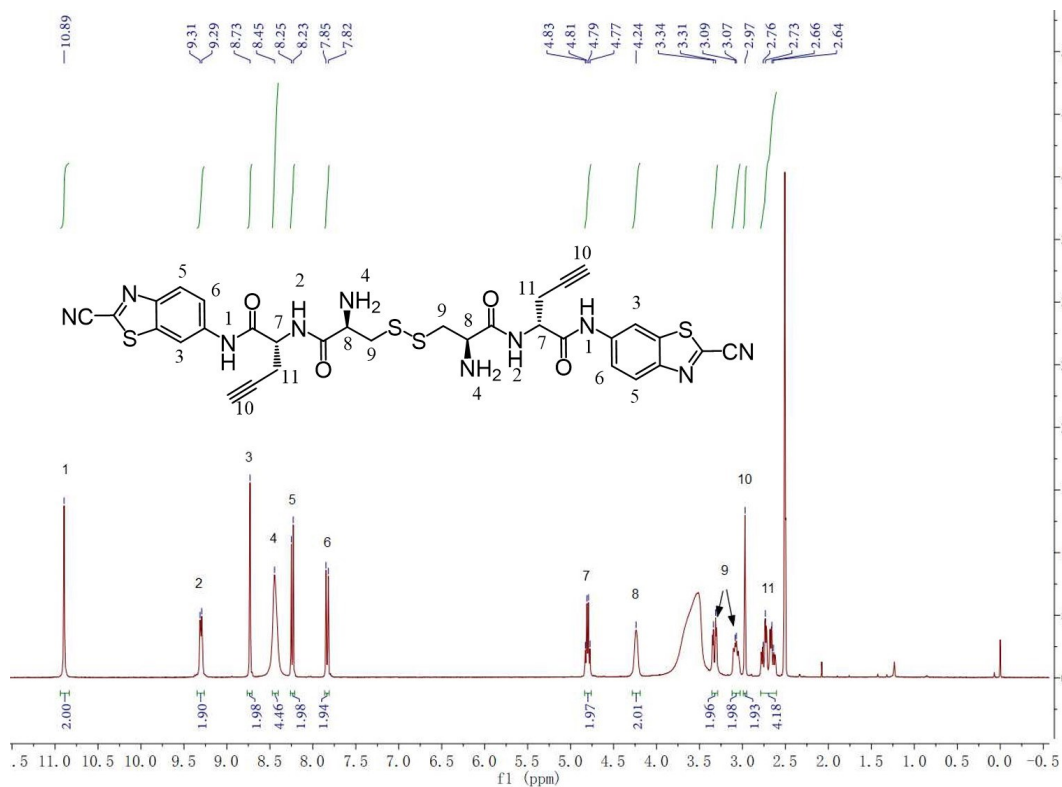

**Fig. S13.**  $^1\text{H}$  NMR spectrum of compound 3.

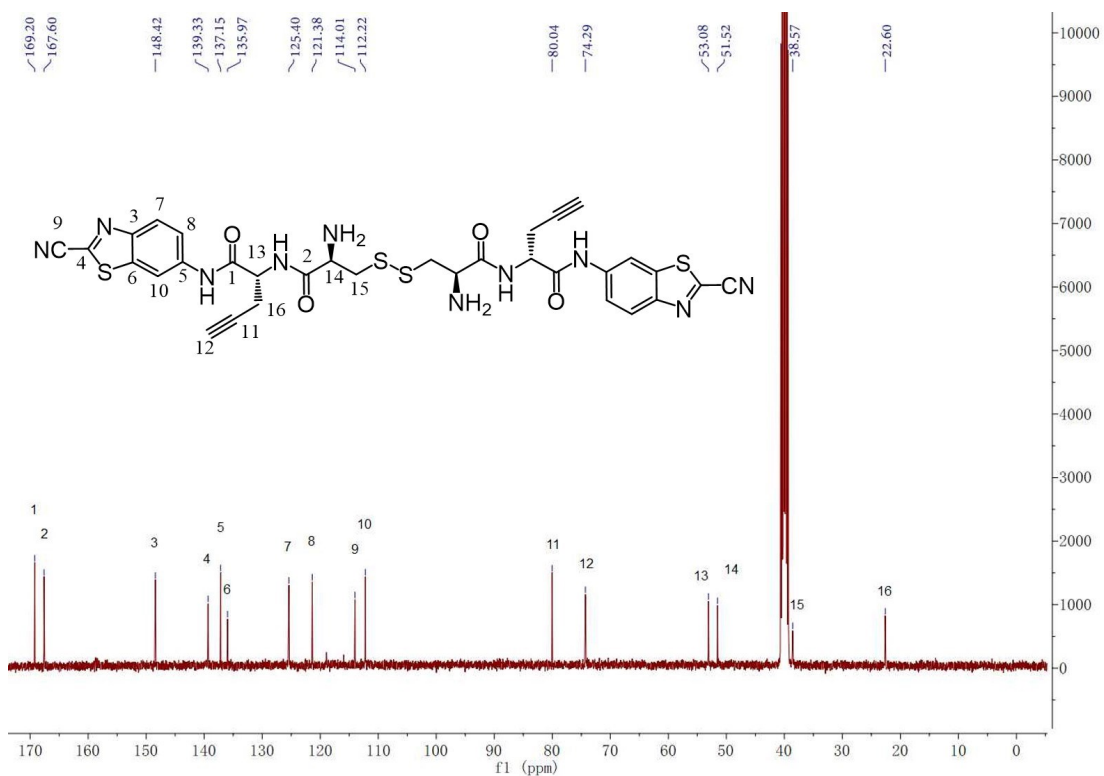

Fig. S14.  $^{13}\text{C}$  NMR spectrum of compound 3.

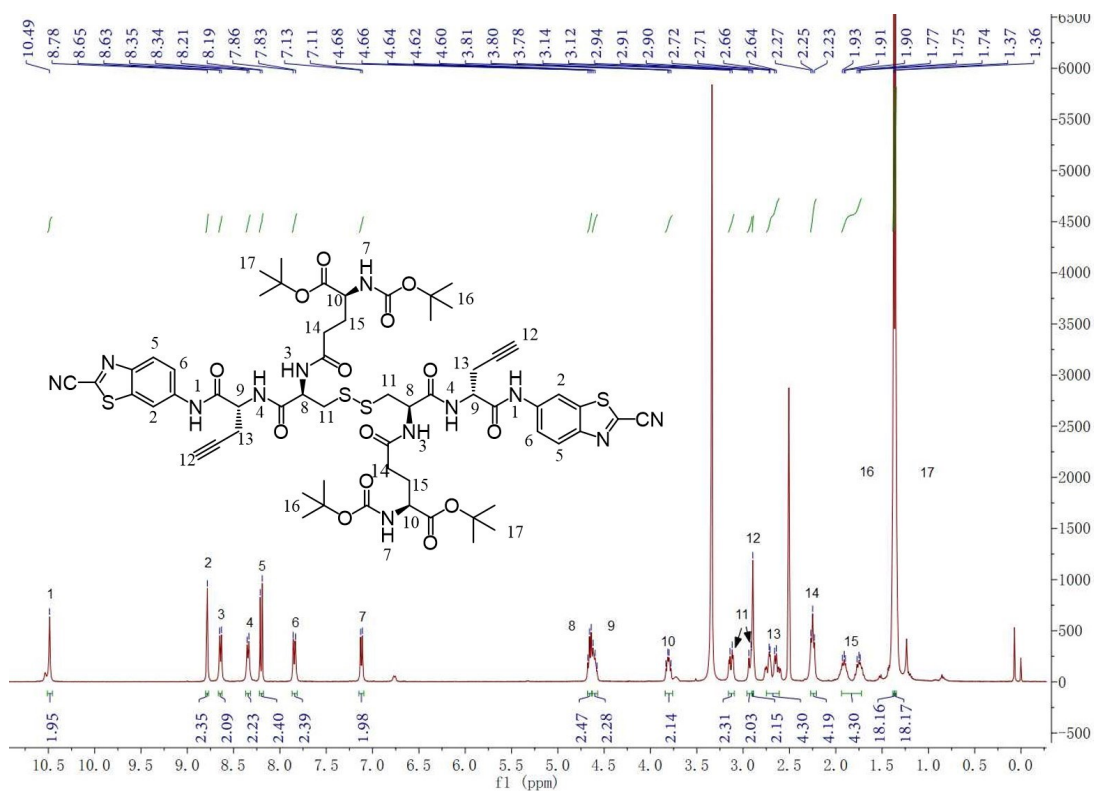

Fig. S15.  $^1\text{H}$  NMR spectrum of compound 4.



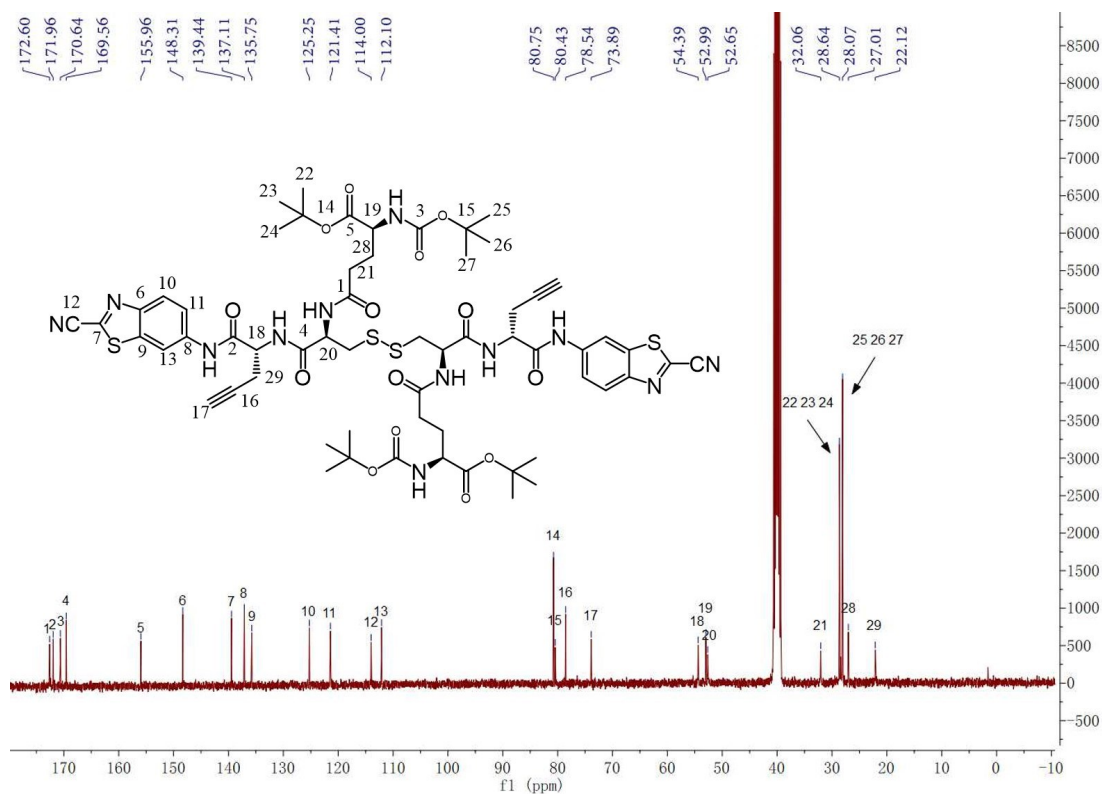

**Fig. S16.** <sup>13</sup>C NMR spectrum of compound 4.

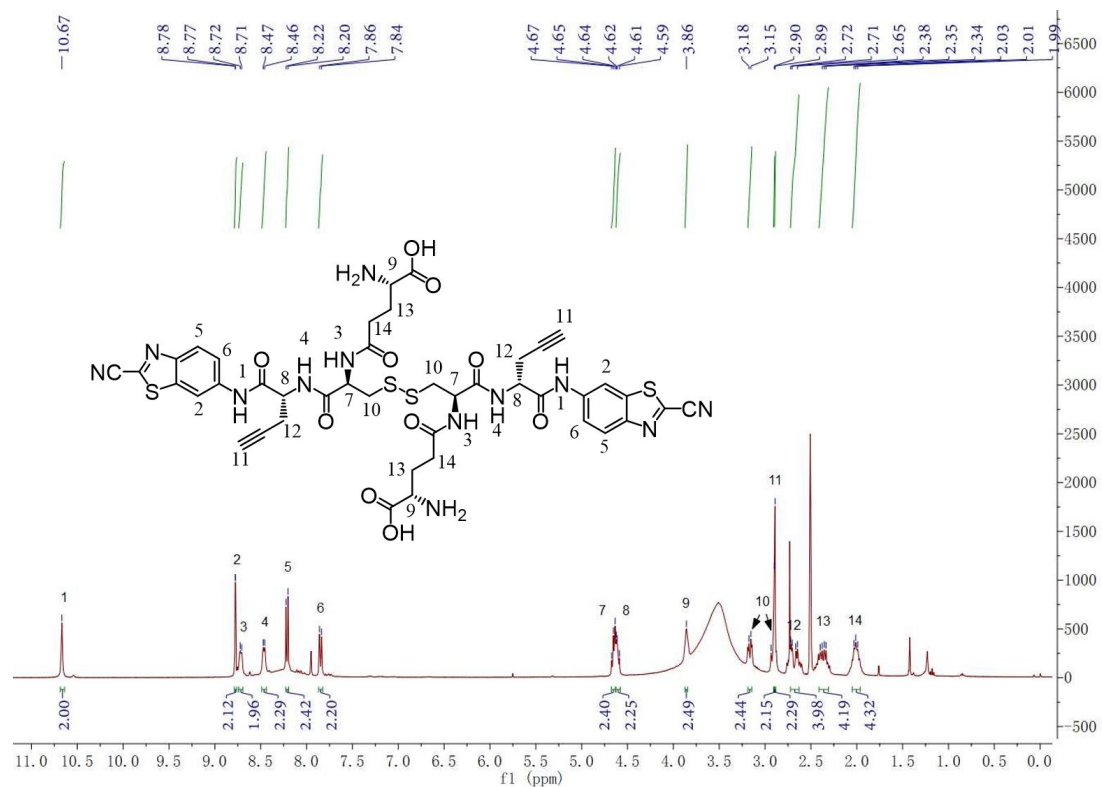

**Fig. S17.** <sup>1</sup>H NMR spectrum of compound 5.

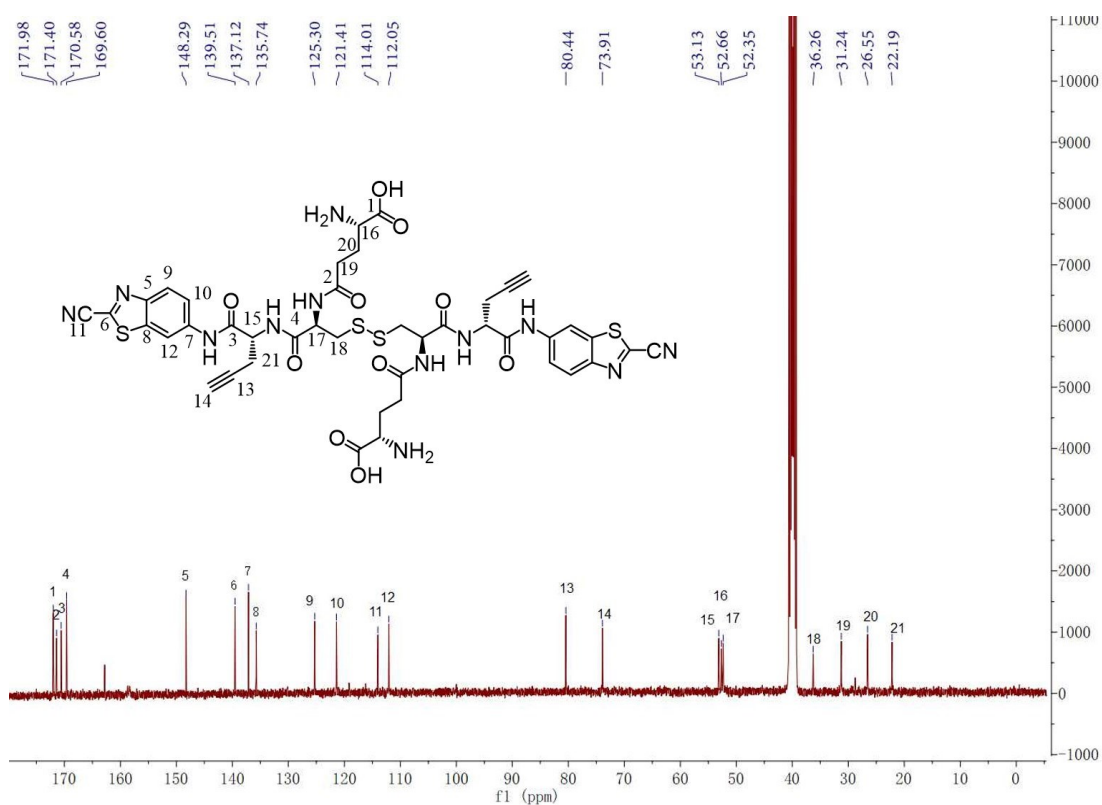

**Fig. S18.**  $^{13}\text{C}$  NMR spectrum of compound 5.

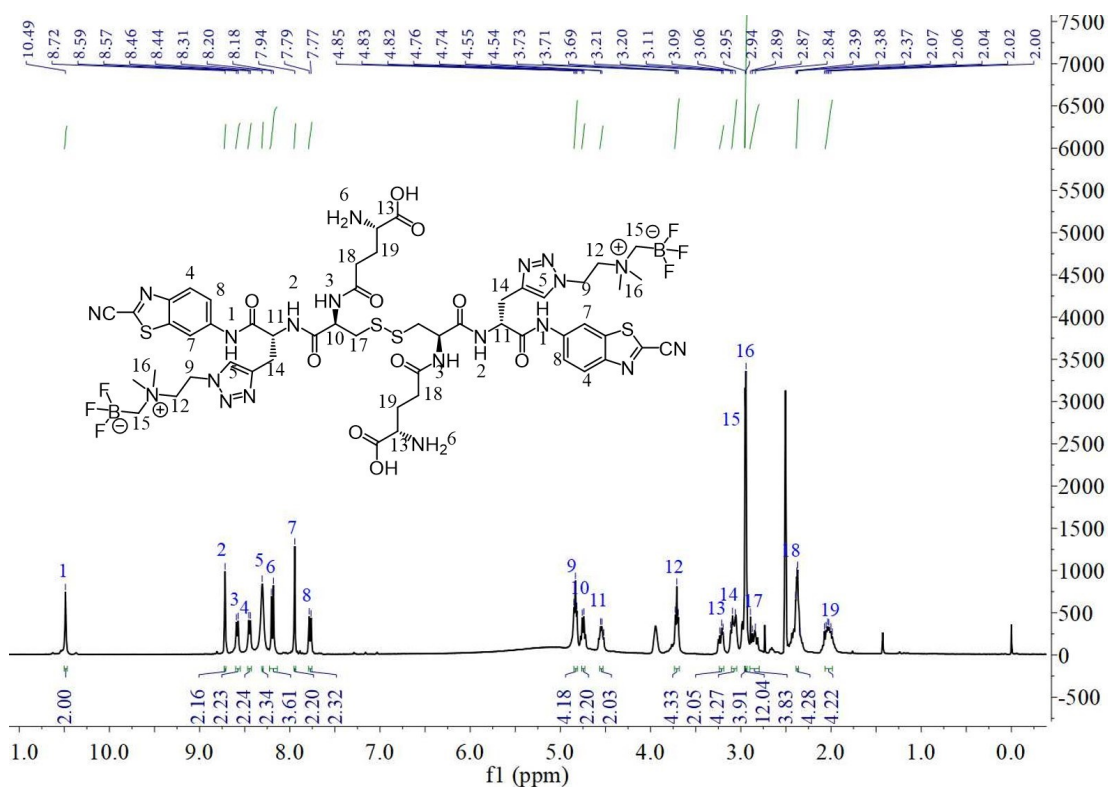

**Fig. S19.**  $^1\text{H}$  NMR spectrum of non-radioactive probe  $(\text{GCPA})_2$ .

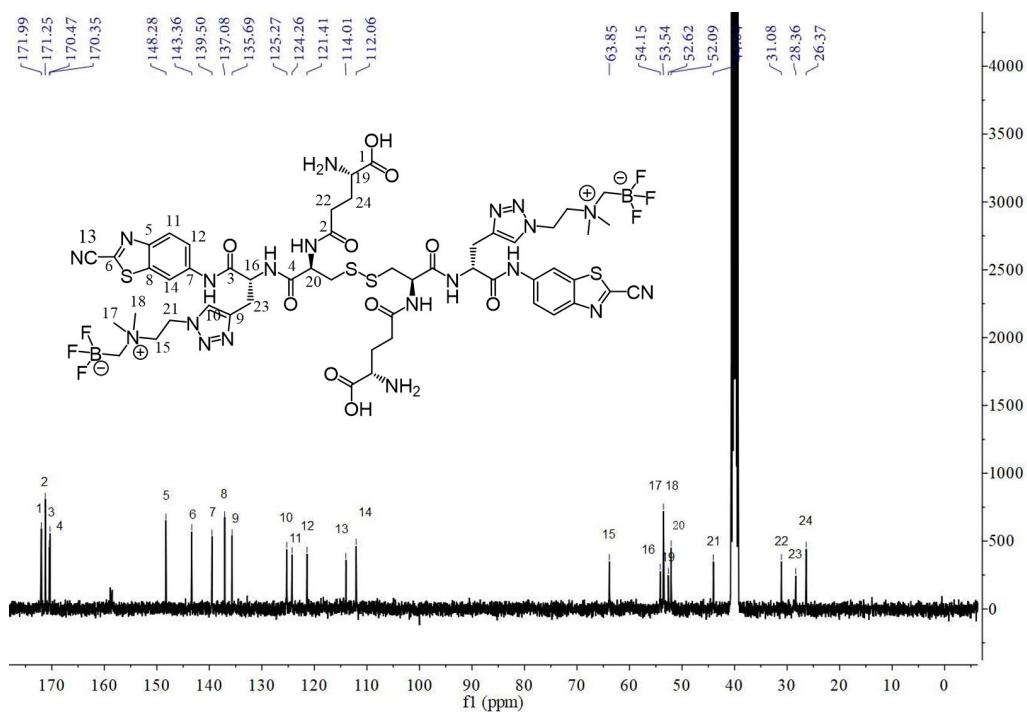

**Fig. S20.** <sup>13</sup>C NMR spectrum of non-radioactive probe (GCPA)<sub>2</sub>.

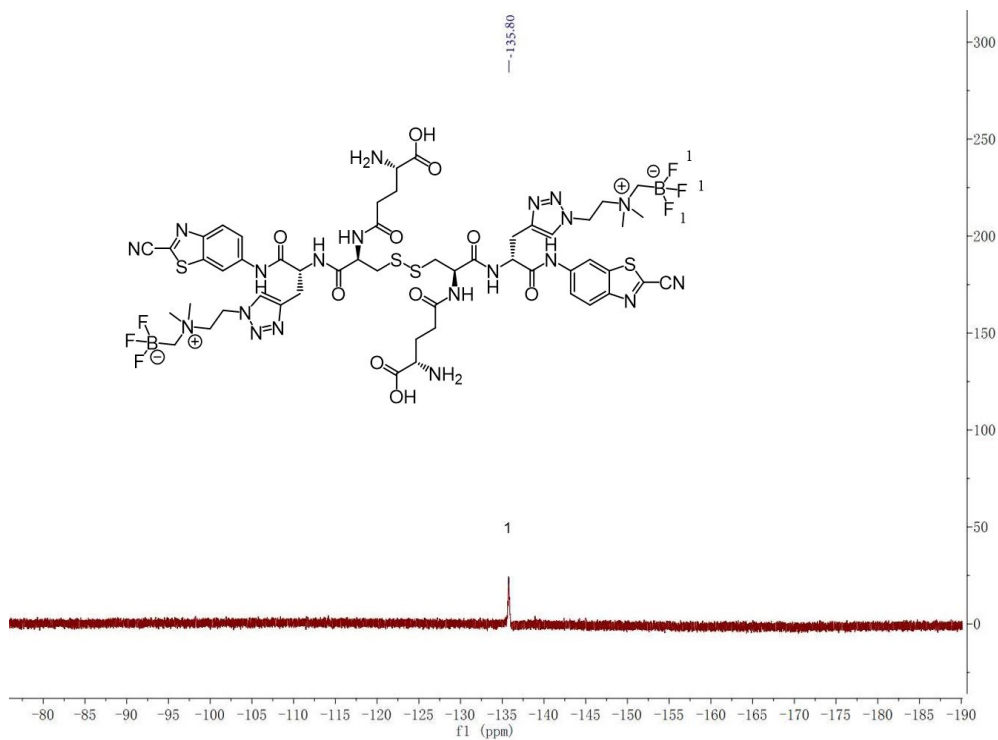

**Fig. S21.** <sup>19</sup>F NMR spectrum of non-radioactive probe (GCPA)<sub>2</sub>.

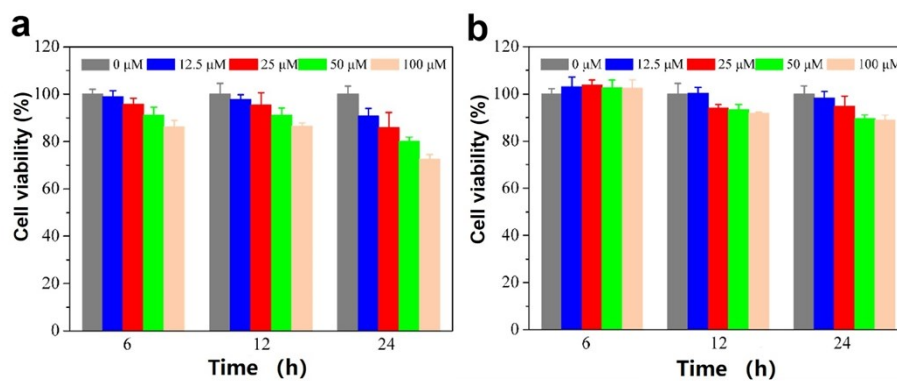

**Fig. S22.** Cytotoxicity assay of non-radioactive probe (GCPA)<sub>2</sub> against (a) L929 and (b) HCT116 at different concentrations (0.0, 12.5, 25.0, 50.0 and 100.0 μM) after incubated for 6, 12, and 24 h.

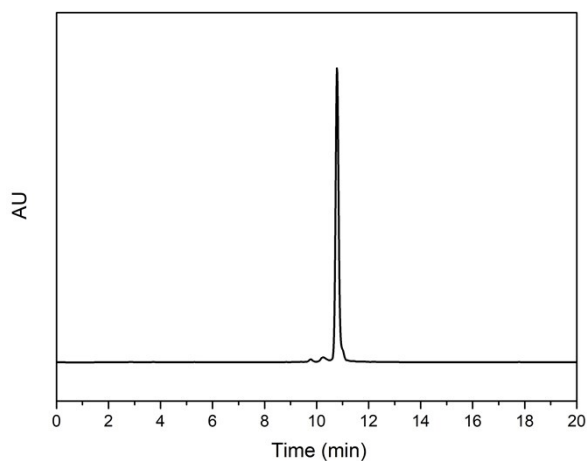

**Fig. S23.** HPLC trace of GGT cleavage product C1.

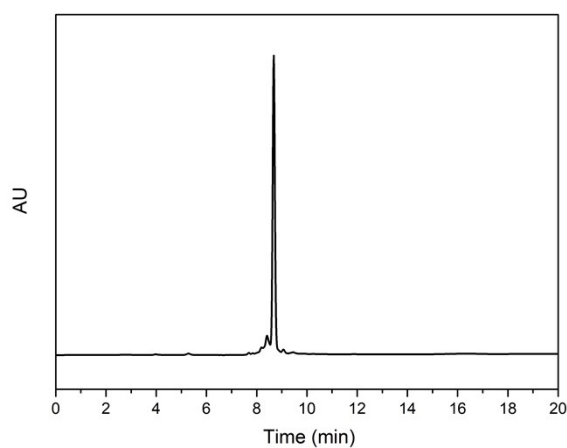

**Fig. S24.** HPLC trace of GGT cleavage product C2.

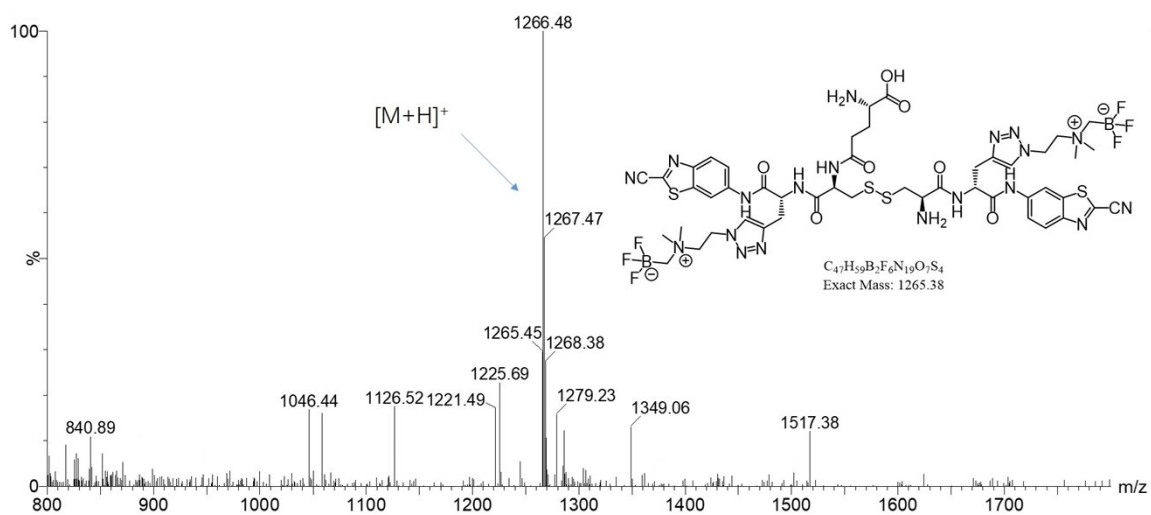

Fig. S25. ESI-MS analysis of GGT cleavage product C1.

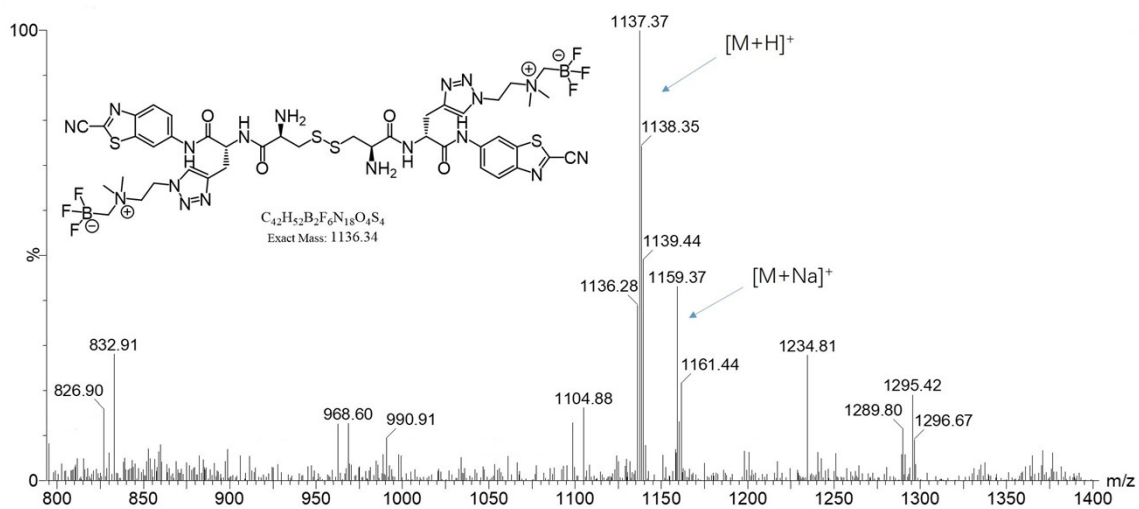

Fig. S26. ESI-MS analysis of GGT cleavage product C2.

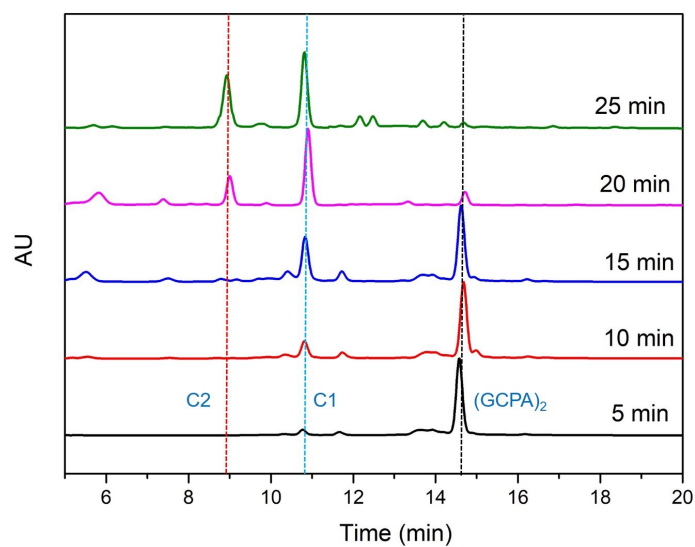

Fig. S27. Time-course of  $(CGPA)_2$ , C1 and C2 signal as  $(GCPA)_2$  incubated with GGT from 5 to 25 min.

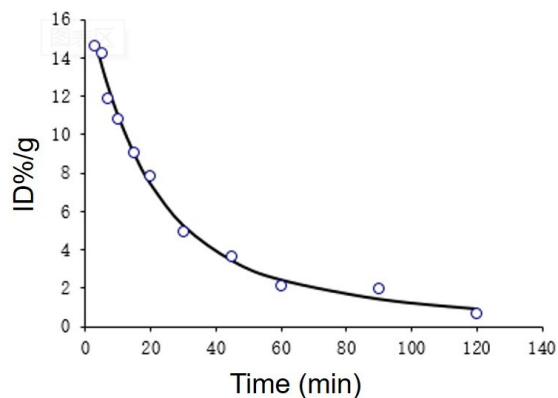

**Fig. S28.** Correlation between the blood radioactivity and time for the probe ( $[^{18}\text{F}]\text{GCPA}$ )<sub>2</sub>.

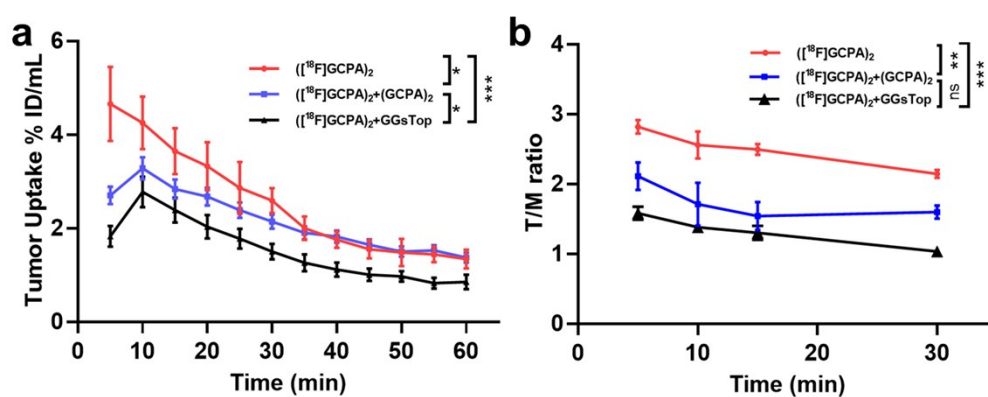

**Fig. S29.** Statistical analysis of tumor uptake (a) and T/M ratios (b) between different treatment groups. (\* $P < 0.05$ , \*\*  $P < 0.01$ , \*\*\*  $P < 0.001$ )
